# Supplementary material for: Marine snow morphology illuminates the evolution of phytoplankton blooms and determines their subsequent vertical export
Source: PubMed Central journal article supplement (PMC8121919; doi:10.1038/s41467-021-22994-4), 2021-05-14
Supplement: 41467_2021_22994_MOESM1_ESM.pdf [file 41467_2021_22994_MOESM1_ESM.pdf]

## Marine snow morphology illuminates the evolution of phytoplankton blooms and determines their subsequent vertical export.

Emilia Trudnowska<sup>1</sup>, Léo Lacour<sup>2</sup>, Mathieu Ardyna<sup>3,4</sup>, Andreas Rogge<sup>5,6</sup>, Jean Olivier Irisson<sup>4</sup>, Anya M. Waite<sup>7</sup>, Marcel Babin<sup>2</sup>, Lars Stemann<sup>4</sup>

<sup>1</sup> Institute of Oceanology Polish Academy of Sciences, Sopot, Poland

<sup>2</sup> Takuvik Joint International Laboratory (CNRS and Université Laval), Québec, Qc, Canada

<sup>3</sup> Department of Earth System Science, Stanford University, Stanford, CA, 94305, USA

<sup>4</sup> Sorbonne Université, CNRS, Laboratoire d'Océanographie de Villefranche, LOV, F-06230 Villefranche-sur-Mer, France

<sup>5</sup> Alfred Wegener Institute, Helmholtz Center for Polar and Marine Research, Bremerhaven, Germany

<sup>6</sup> Institute for Ecosystem Research, Kiel University, Kiel, Germany

<sup>7</sup> Ocean Frontier Institute and Dept. of Oceanography, Dalhousie University, Halifax, Nova Scotia, Canada

Corresponding author: emilia@iopan.pl

### Abstract

The organic carbon produced in the ocean's surface by phytoplankton is either passed through the food web or exported to the ocean interior as marine snow. The rate and efficiency of such vertical export strongly depend on the size, structure and shape of individual particles, but apart from size, other morphological properties are still not quantitatively monitored. With the growing number of *in situ* imaging technologies, there is now a great possibility to analyze the morphology of individual marine snow. Thus, automated methods for their classification are urgently needed. Consequently, here we present a simple, novel categorization method of marine snow into a few ecologically meaningful functional morphotypes using field data from successive phases of the Arctic phytoplankton bloom. . The proposed approach is a promising tool for future studies aiming to integrate the diversity, composition and morphology of marine snow into our understanding of the biological carbon pump.

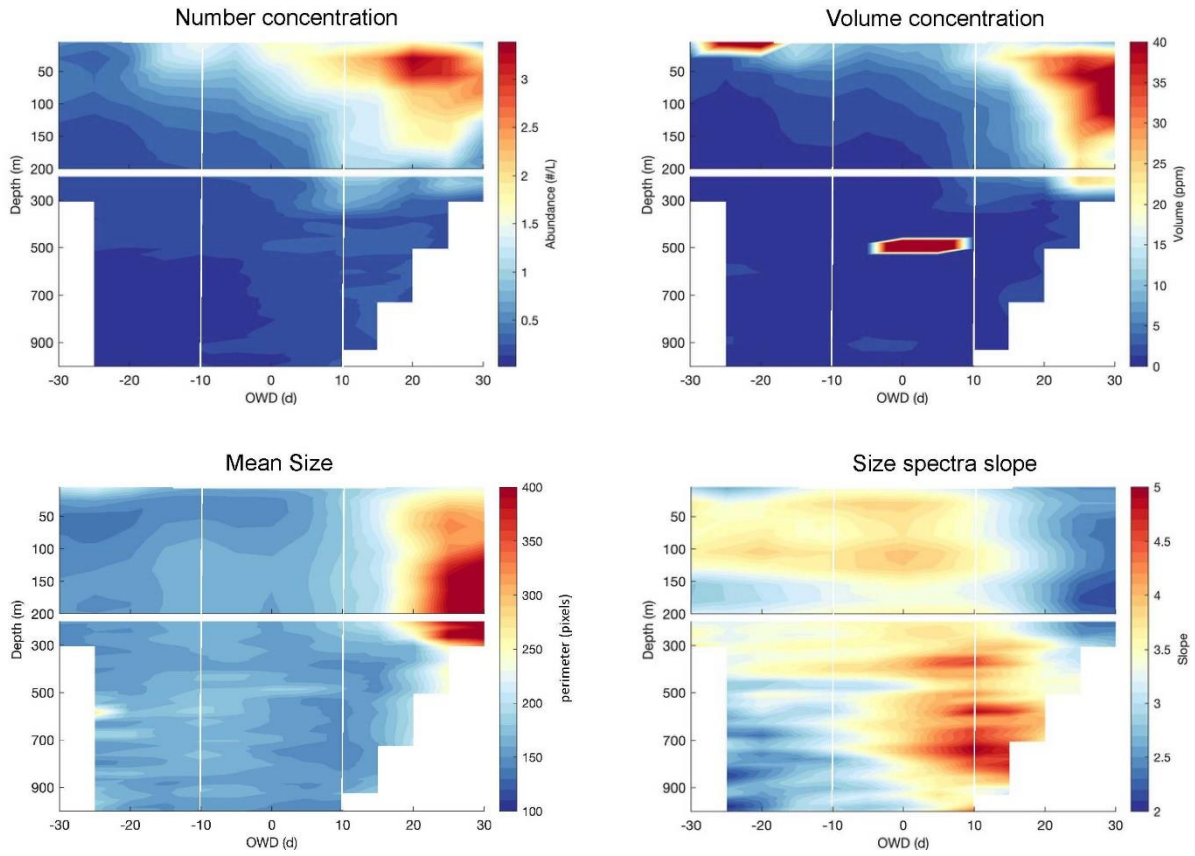

Supplementary Figure 1. Section plots of marine snow total abundance and volumetric particle concentrations, mean size (pixels) and size spectra slopes over depth and ice-related time (open water days (OWD)) in Baffin Bay. Vertical lines indicate the ranges of assigned periods (under ice, ice breakup, ice-free).

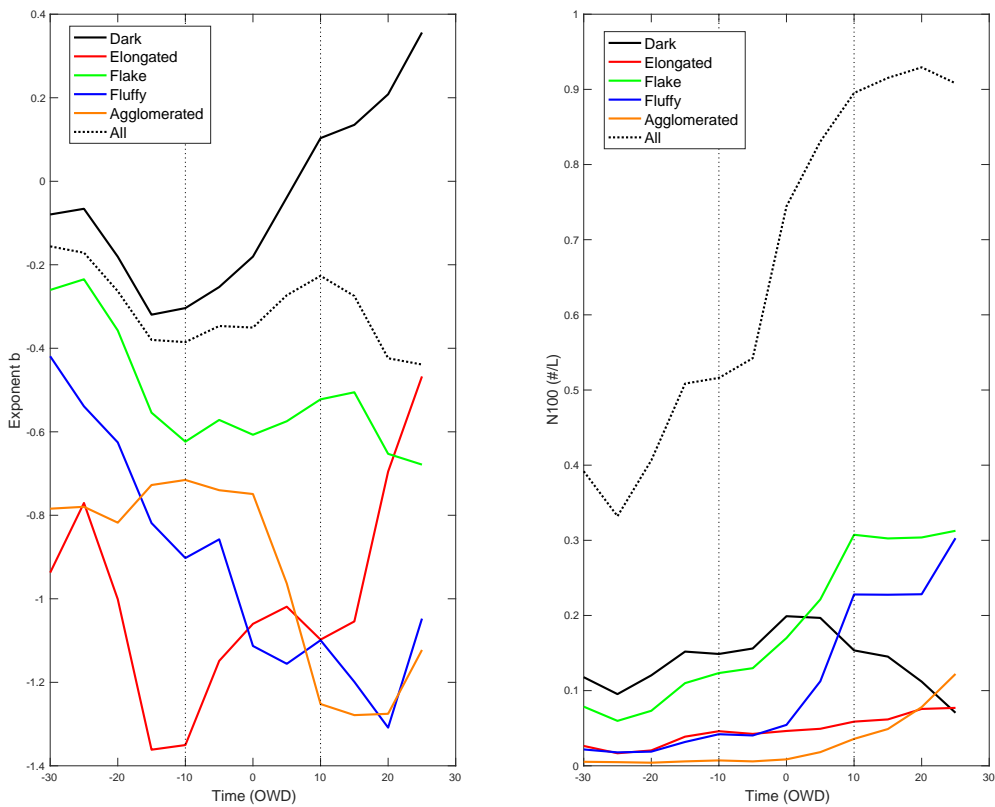

Supplementary Figure 2. Time series of the  $b$  value of the exponent of the power law and the abundance at the reference depth of 100m ( $N_{100}$ (#/L), fitted on the vertical profiles of abundance of the five categories of marine snow (indicated by colors) and of their sum (All).

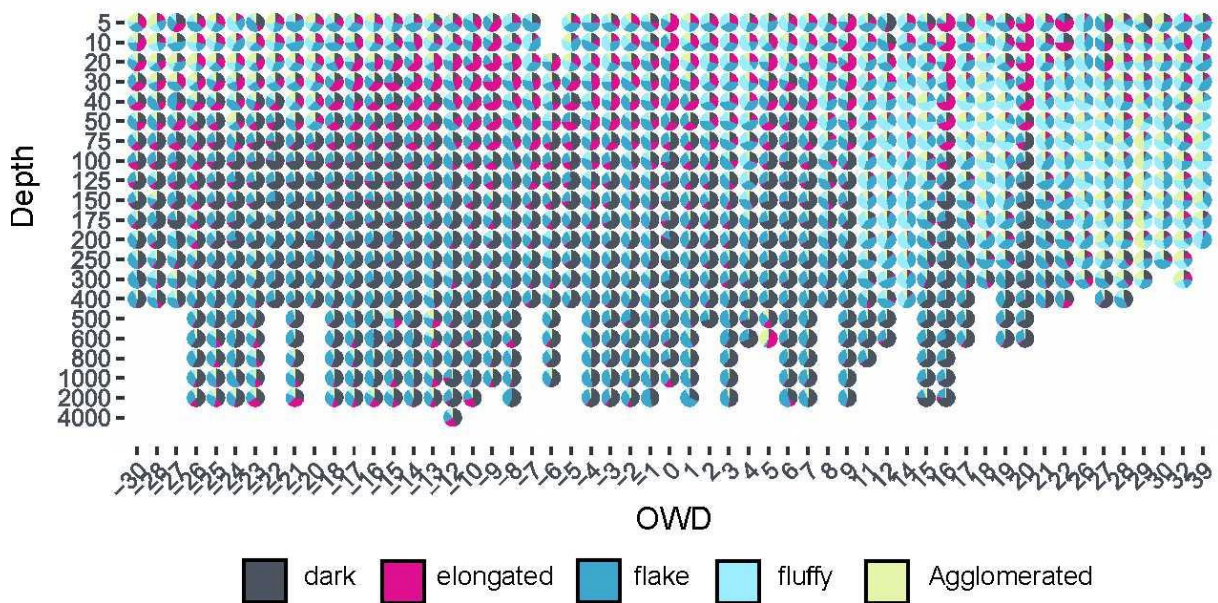

Supplementary Figure 3. The proportions of marine snow morpho-types over depth and ice-related time (open water days (OWD)) in Baffin Bay.

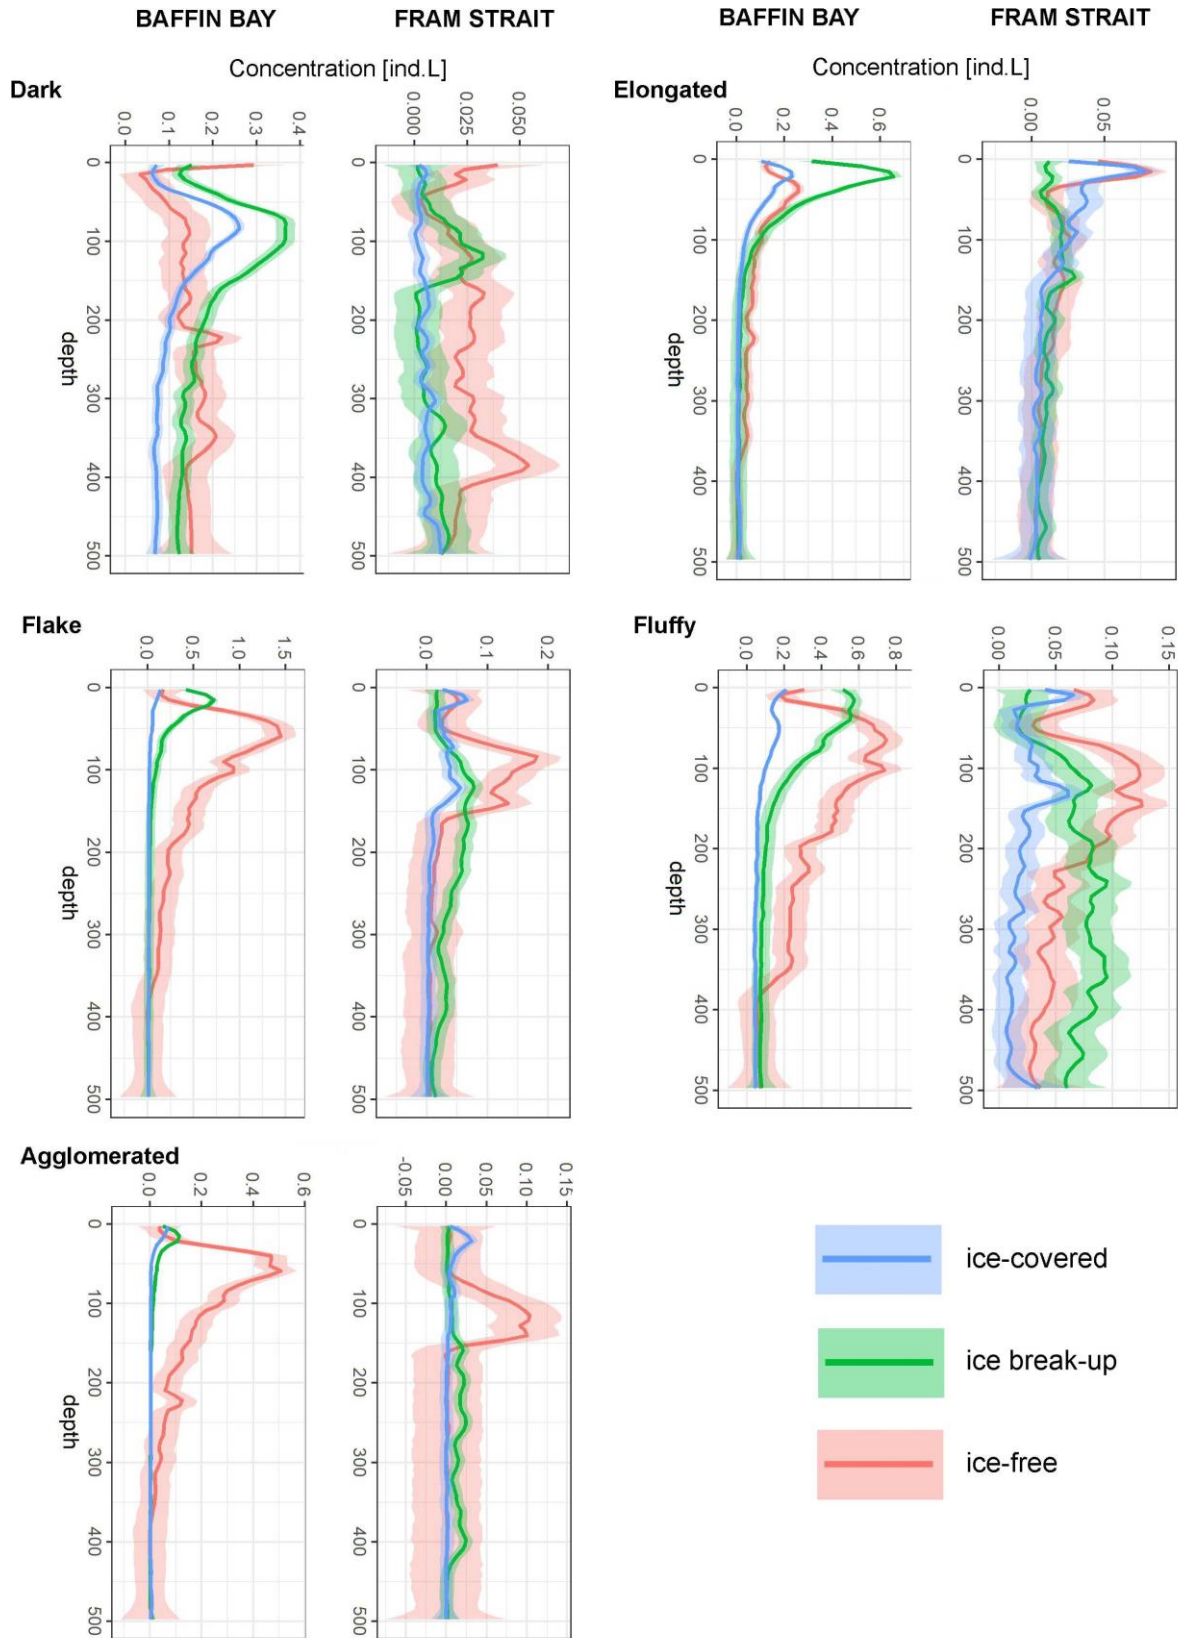

Supplementary Fig. 4. Mean abundances (lines) and standard errors (shades) of marine snow morho-types (dark, elongated, flake, fluffy, agglomerated) in the upper 500 m of the water column in the studied ice-related regimes and locations (marked with colors).

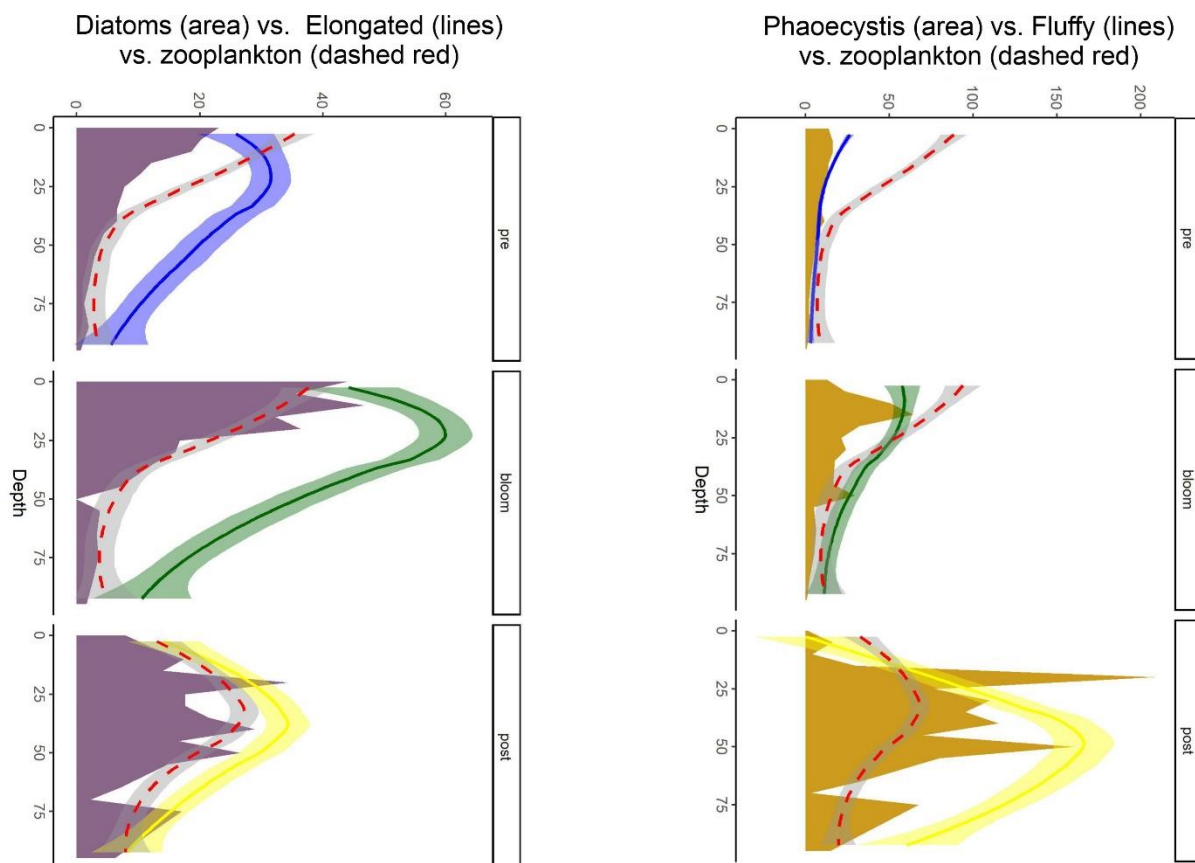

Supplementary Figure 5. Vertical profiles of phytoplankton pigment concentrations (colored areas: Diatoms (purple) and *Phaeocystis* (brownish)), marine snow (elongated and fluffy morphotypes plotted as lines with standard error shades colored according to the bloom phases: pre (ice-covered), bloom (ice break-up), post (ice-free)) in Baffin Bay. Zooplankton abundances are shown as dashed red line.

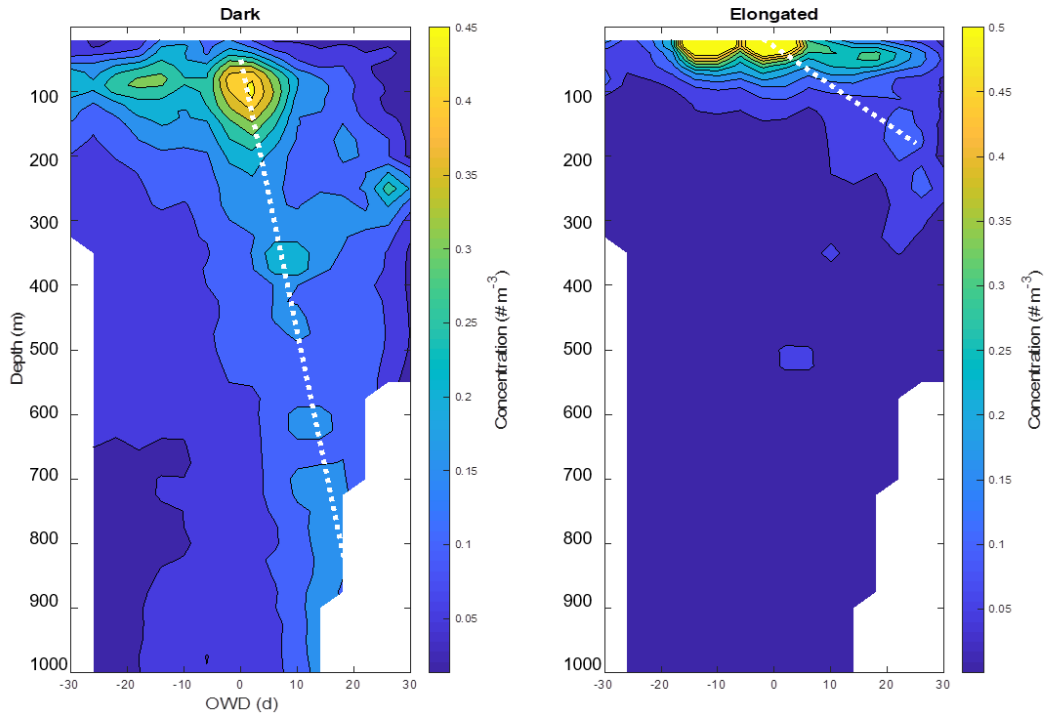

Supplementary Figure 6. The concentrations of dark and elongated morphotypes over depth and ice-related time (open water days (OWD)) in Baffin Bay. White lines show the best linear fit of the maximum abundance of used to calculate the sinking rate. Dark:  $38 \text{ m}\cdot\text{d}^{-1}$  (30.02 - 47.48, 95% confidence intervals). Elongated:  $7.2 \text{ m}\cdot\text{d}^{-1}$  (confident interval of 0.11 - 14.51).

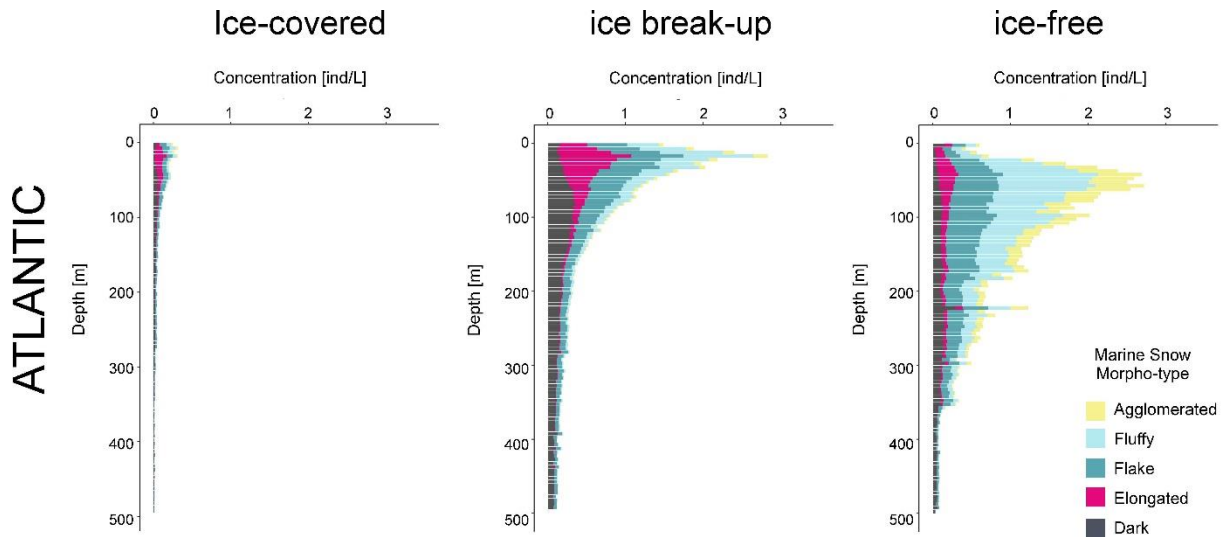

Supplementary Figure 7. Concentrations of marine snow morpho-types over 5-meter depth intervals in defined phases in the Atlantic water masses of the Baffin Bay.

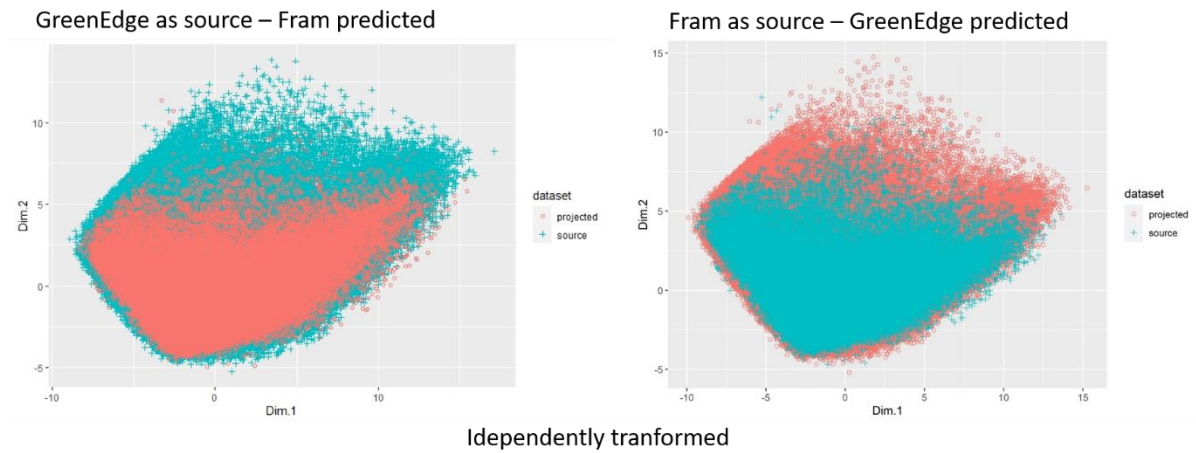

Supplementary Figure 8. The correspondence between PCA morpho-space built on the Baffin Bay dataset (GreenEdge) as source (green colour) and the Fram Strait as projected (orange) and vice versa (right panel).

Supplementary Table. The list of morphological properties, their mean values (given in pixels) for particular morphotypes of marine snow, type, applied transformation and description. Please note that values of the grey level are reversed, i.e., the higher the value the lighter the colour. The ‘trim’ transformation is used to get rid of the extreme variables (falling beyond the 0.001 probability).

| Parameter  | Dark  | Elongated | Mid   | Fluffy | Hetero | Type       | Transformation | Description                                                                                                                                                                                   |
|------------|-------|-----------|-------|--------|--------|------------|----------------|-----------------------------------------------------------------------------------------------------------------------------------------------------------------------------------------------|
| area       | 2.12  | 2.14      | 2.24  | 2.05   | 2.72   | Size       | log10(trim())  | Surface area of the object in square pixels                                                                                                                                                   |
| mean       | 135.9 | 202.0     | 229.9 | 209.2  | 232.1  | Grey level | trim()         | Average grey value within the object; sum of the grey values of all pixels in the object divided by the number of pixels                                                                      |
| stddev     | 93.1  | 50.4      | 24.9  | 39.4   | 25.1   | Structure  | trim()         | Standard deviation of the grey value used to generate the mean grey value                                                                                                                     |
| mode       | 9.4   | 185.3     | 245.5 | 233.2  | 240.8  | Grey level | trim()         | Modal grey value within the object                                                                                                                                                            |
| perim      | 1.68  | 1.87      | 1.88  | 1.67   | 2.24   | Size       | log10(trim())  | The length of the outside boundary of the object                                                                                                                                              |
| major      | 1.21  | 1.44      | 1.31  | 1.19   | 1.56   | Size       | log10(trim())  | Primary axis of the best fitting ellipse for the object                                                                                                                                       |
| circ       | 0.73  | 0.33      | 0.41  | 0.67   | 0.25   | Shape      | trim()         | circularity : $(4*\pi*Area)/Perim^2$ a value of 1 indicates a perfect circle, a value approaching 0 indicates an increasingly elongated polygon                                               |
| feret      | 1.25  | 1.48      | 1.38  | 1.23   | 1.65   | Size       | log10(trim())  | Maximum feret diameter, i.e. the longest distance between any two points along the object boundary                                                                                            |
| intden     | 4.24  | 4.44      | 4.61  | 4.37   | 5.08   | Grey level | log10(trim())  | Integrated density. The sum of the grey values of the pixels in the object (i.e. = Area*Mean)                                                                                                 |
| median     | 146   | 220       | 238   | 220    | 240    | Grey level | trim()         | Median grey value within the object.                                                                                                                                                          |
| skew       | -0.24 | -1.13     | -1.83 | -0.97  | -2.50  | Structure  | trim()         | Skewness of the histogram of grey level values                                                                                                                                                |
| kurt       | -1.35 | 0.88      | 4.47  | 0.48   | 9.94   | Structure  | trim()         | Kurtosis of the histogram of grey level values                                                                                                                                                |
| %area      | 4.61  | 4.61      | 4.60  | 4.61   | 4.58   | Structure  | log1p(trim())  | Percentage of object's surface area that is comprised of holes, defined as the background grey level                                                                                          |
| fractal    | 0.83  | 0.90      | 0.92  | 0.82   | 1.11   | Size       | trim()         | Fractal dimension of object boundary                                                                                                                                                          |
| skelarea   | 1.06  | 1.46      | 1.56  | 1.14   | 2.10   | Size       | log10(trim())  | Surface area of skeleton in pixels. In a binary image, the skeleton is obtained by repeatedly removing pixels from the edges of objects until they are reduced to the width of a single pixel |
| slope      | 0.03  | 0.02      | 0.03  | 0.01   | 0.09   | Structure  | trim()         | Slope of the grey level normalized cumulative histogram                                                                                                                                       |
| symetrieh  | 0.32  | 0.68      | 0.43  | 0.34   | 0.49   | Shape      | log10(trim())  | Bilateral horizontal symmetry index                                                                                                                                                           |
| symetriev  | 0.32  | 0.68      | 0.43  | 0.34   | 0.49   | Shape      | log10(trim())  | Bilateral vertical symmetry index                                                                                                                                                             |
| thickr     | 0.92  | 1.01      | 1.09  | 0.95   | 1.25   | Shape      | log1p(trim())  | Thickness Ratio; relation between the maximum thickness of an object and the average thickness of the object excluding the maximum                                                            |
| elongation | 0.20  | 0.62      | 0.26  | 0.21   | 0.29   | Shape      | log10(trim())  | The ratio between major/minor axes                                                                                                                                                            |
| range      | 252.6 | 183.2     | 127.0 | 154.8  | 154.4  | Grey level | trim()         | max-min (of grey values)                                                                                                                                                                      |
| meanpos    | -0.91 | -0.40     | -0.26 | -0.42  | -0.19  | Structure  | trim()         | (max-mean)/range (of grey values)                                                                                                                                                             |
| cv         | 71.3  | 27.7      | 11.3  | 20.0   | 11.6   | Structure  | trim()         | 100*(stdv/mean) (of grey values)                                                                                                                                                              |
| sr         | 36.9  | 26.3      | 19.6  | 25.1   | 16.2   | Structure  | trim()         | 100*(stdv/(max-min)) (of grey values)                                                                                                                                                         |



Supplementary Table 2. The geographical location and sampling dates of samples stations.

| Latitude | Longitude | date       | Station ID  | Project |
|----------|-----------|------------|-------------|---------|
| 68,50    | -56,79    | 09.06.2016 | ge_2016_003 | Green   |
| 68,50    | -56,79    | 09.06.2016 | ge_2016_004 | Green   |
| 68,50    | -57,48    | 10.06.2016 | ge_2016_006 | Green   |
| 68,50    | -57,47    | 10.06.2016 | ge_2016_007 | Green   |
| 68,50    | -57,13    | 10.06.2016 | ge_2016_005 | Green   |
| 68,50    | -58,52    | 11.06.2016 | ge_2016_010 | Green   |
| 68,50    | -59,27    | 11.06.2016 | ge_2016_014 | Green   |
| 68,50    | -58,15    | 11.06.2016 | ge_2016_008 | Green   |
| 68,52    | -59,27    | 11.06.2016 | ge_2016_013 | Green   |
| 68,50    | -59,18    | 11.06.2016 | ge_2016_012 | Green   |
| 68,50    | -57,64    | 11.06.2016 | ge_2016_009 | Green   |
| 68,50    | -58,82    | 11.06.2016 | ge_2016_011 | Green   |
| 68,53    | -60,14    | 12.06.2016 | ge_2016_019 | Green   |
| 68,51    | -59,50    | 12.06.2016 | ge_2016_015 | Green   |
| 68,53    | -60,14    | 12.06.2016 | ge_2016_018 | Green   |
| 68,53    | -60,17    | 12.06.2016 | ge_2016_017 | Green   |
| 68,52    | -59,84    | 12.06.2016 | ge_2016_016 | Green   |
| 68,50    | -60,88    | 13.06.2016 | ge_2016_022 | Green   |
| 68,55    | -60,65    | 13.06.2016 | ge_2016_021 | Green   |
| 68,46    | -61,36    | 13.06.2016 | ge_2016_024 | Green   |
| 68,44    | -61,36    | 13.06.2016 | ge_2016_025 | Green   |
| 68,52    | -61,10    | 13.06.2016 | ge_2016_023 | Green   |
| 68,47    | -60,44    | 13.06.2016 | ge_2016_020 | Green   |
| 68,58    | -60,10    | 14.06.2016 | ge_2016_027 | Green   |
| 68,61    | -59,93    | 14.06.2016 | ge_2016_029 | Green   |
| 68,59    | -59,94    | 14.06.2016 | ge_2016_030 | Green   |
| 68,63    | -59,95    | 14.06.2016 | ge_2016_028 | Green   |
| 68,71    | -59,22    | 15.06.2016 | ge_2016_035 | Green   |
| 68,71    | -59,26    | 15.06.2016 | ge_2016_033 | Green   |
| 68,68    | -59,42    | 15.06.2016 | ge_2016_032 | Green   |
| 68,66    | -59,60    | 15.06.2016 | ge_2016_031 | Green   |
| 68,71    | -59,26    | 15.06.2016 | ge_2016_034 | Green   |
| 68,77    | -58,74    | 16.06.2016 | ge_2016_037 | Green   |
| 68,79    | -58,53    | 16.06.2016 | ge_2016_039 | Green   |
| 68,88    | -57,86    | 16.06.2016 | ge_2016_044 | Green   |
| 68,80    | -58,52    | 16.06.2016 | ge_2016_040 | Green   |
| 68,85    | -58,08    | 16.06.2016 | ge_2016_043 | Green   |
| 68,82    | -58,30    | 16.06.2016 | ge_2016_042 | Green   |
| 68,80    | -58,52    | 16.06.2016 | ge_2016_041 | Green   |
| 68,80    | -58,49    | 16.06.2016 | ge_2016_038 | Green   |
| 68,74    | -58,94    | 16.06.2016 | ge_2016_036 | Green   |
| 69,00    | -56,78    | 17.06.2016 | ge_2016_049 | Green   |
| 69,01    | -55,99    | 17.06.2016 | ge_2016_047 | Green   |
| 68,91    | -57,65    | 17.06.2016 | ge_2016_045 | Green   |

|       |        |            |             |       |
|-------|--------|------------|-------------|-------|
| 69,00 | -56,79 | 17.06.2016 | ge_2016_048 | Green |
| 68,98 | -58,13 | 17.06.2016 | ge_2016_046 | Green |
| 69,00 | -58,74 | 18.06.2016 | ge_2016_057 | Green |
| 69,00 | -58,42 | 18.06.2016 | ge_2016_060 | Green |
| 69,00 | -57,25 | 18.06.2016 | ge_2016_052 | Green |
| 69,00 | -57,71 | 18.06.2016 | ge_2016_054 | Green |
| 69,03 | -59,06 | 19.06.2016 | ge_2016_062 | Green |
| 68,99 | -59,33 | 19.06.2016 | ge_2016_063 | Green |
| 69,01 | -59,80 | 19.06.2016 | ge_2016_064 | Green |
| 69,03 | -59,63 | 19.06.2016 | ge_2016_067 | Green |
| 69,01 | -60,05 | 20.06.2016 | ge_2016_068 | Green |
| 69,01 | -60,74 | 20.06.2016 | ge_2016_071 | Green |
| 69,01 | -60,95 | 20.06.2016 | ge_2016_072 | Green |
| 69,00 | -61,19 | 21.06.2016 | ge_2016_075 | Green |
| 69,03 | -61,44 | 21.06.2016 | ge_2016_076 | Green |
| 69,01 | -62,12 | 21.06.2016 | ge_2016_079 | Green |
| 68,96 | -62,33 | 21.06.2016 | ge_2016_082 | Green |
| 69,00 | -62,60 | 22.06.2016 | ge_2016_083 | Green |
| 68,02 | -62,42 | 24.06.2016 | ge_2016_086 | Green |
| 68,07 | -62,13 | 25.06.2016 | ge_2016_087 | Green |
| 68,03 | -61,61 | 25.06.2016 | ge_2016_091 | Green |
| 68,03 | -61,60 | 25.06.2016 | ge_2016_089 | Green |
| 68,03 | -61,65 | 25.06.2016 | ge_2016_090 | Green |
| 68,08 | -61,86 | 25.06.2016 | ge_2016_088 | Green |
| 68,09 | -61,35 | 25.06.2016 | ge_2016_092 | Green |
| 68,08 | -60,82 | 26.06.2016 | ge_2016_094 | Green |
| 68,12 | -60,27 | 26.06.2016 | ge_2016_096 | Green |
| 68,11 | -59,99 | 26.06.2016 | ge_2016_099 | Green |
| 68,09 | -61,08 | 26.06.2016 | ge_2016_093 | Green |
| 68,10 | -60,55 | 26.06.2016 | ge_2016_095 | Green |
| 68,11 | -59,97 | 26.06.2016 | ge_2016_098 | Green |
| 68,11 | -59,99 | 26.06.2016 | ge_2016_097 | Green |
| 68,12 | -58,97 | 27.06.2016 | ge_2016_106 | Green |
| 68,11 | -59,73 | 27.06.2016 | ge_2016_100 | Green |
| 68,13 | -58,98 | 27.06.2016 | ge_2016_108 | Green |
| 68,14 | -58,99 | 27.06.2016 | ge_2016_109 | Green |
| 68,12 | -58,94 | 27.06.2016 | ge_2016_103 | Green |
| 68,11 | -58,69 | 27.06.2016 | ge_2016_104 | Green |
| 68,12 | -59,45 | 27.06.2016 | ge_2016_101 | Green |
| 68,12 | -58,97 | 27.06.2016 | ge_2016_107 | Green |
| 68,11 | -59,20 | 27.06.2016 | ge_2016_102 | Green |
| 68,11 | -58,42 | 27.06.2016 | ge_2016_105 | Green |
| 68,11 | -57,77 | 28.06.2016 | ge_2016_110 | Green |
| 68,12 | -57,76 | 28.06.2016 | ge_2016_112 | Green |
| 68,11 | -57,77 | 28.06.2016 | ge_2016_111 | Green |
| 68,11 | -58,12 | 28.06.2016 | ge_2016_113 | Green |
| 70,00 | -57,19 | 29.06.2016 | ge_2016_118 | Green |

|       |        |            |             |       |
|-------|--------|------------|-------------|-------|
| 70,00 | -56,90 | 29.06.2016 | ge_2016_117 | Green |
| 68,11 | -57,34 | 29.06.2016 | ge_2016_115 | Green |
| 68,11 | -57,86 | 29.06.2016 | ge_2016_114 | Green |
| 68,11 | -57,07 | 29.06.2016 | ge_2016_116 | Green |
| 70,00 | -58,66 | 30.06.2016 | ge_2016_127 | Green |
| 70,01 | -59,12 | 30.06.2016 | ge_2016_123 | Green |
| 70,00 | -58,07 | 30.06.2016 | ge_2016_121 | Green |
| 70,01 | -59,13 | 30.06.2016 | ge_2016_125 | Green |
| 70,00 | -57,46 | 30.06.2016 | ge_2016_119 | Green |
| 70,01 | -59,12 | 30.06.2016 | ge_2016_124 | Green |
| 70,00 | -57,76 | 30.06.2016 | ge_2016_120 | Green |
| 70,00 | -58,36 | 30.06.2016 | ge_2016_122 | Green |
| 70,00 | -60,37 | 01.07.2016 | ge_2016_134 | Green |
| 70,00 | -60,68 | 01.07.2016 | ge_2016_133 | Green |
| 70,00 | -60,97 | 01.07.2016 | ge_2016_138 | Green |
| 70,00 | -59,81 | 01.07.2016 | ge_2016_130 | Green |
| 70,00 | -59,51 | 01.07.2016 | ge_2016_129 | Green |
| 70,00 | -59,29 | 01.07.2016 | ge_2016_128 | Green |
| 70,00 | -60,09 | 01.07.2016 | ge_2016_131 | Green |
| 70,00 | -60,36 | 01.07.2016 | ge_2016_132 | Green |
| 69,99 | -61,85 | 02.07.2016 | ge_2016_141 | Green |
| 70,00 | -61,56 | 02.07.2016 | ge_2016_140 | Green |
| 70,00 | -61,24 | 02.07.2016 | ge_2016_139 | Green |
| 70,00 | -62,15 | 02.07.2016 | ge_2016_142 | Green |
| 70,02 | -62,42 | 02.07.2016 | ge_2016_143 | Green |
| 70,46 | -62,50 | 04.07.2016 | ge_2016_156 | Green |
| 70,50 | -62,20 | 04.07.2016 | ge_2016_158 | Green |
| 70,49 | -62,42 | 04.07.2016 | ge_2016_155 | Green |
| 70,50 | -62,52 | 04.07.2016 | ge_2016_154 | Green |
| 70,50 | -62,80 | 04.07.2016 | ge_2016_153 | Green |
| 70,50 | -63,04 | 04.07.2016 | ge_2016_152 | Green |
| 70,50 | -59,50 | 05.07.2016 | ge_2016_160 | Green |
| 70,47 | -59,48 | 05.07.2016 | ge_2016_161 | Green |
| 70,50 | -59,53 | 05.07.2016 | ge_2016_159 | Green |
| 70,50 | -60,72 | 06.07.2016 | ge_2016_165 | Green |
| 70,50 | -61,91 | 06.07.2016 | ge_2016_169 | Green |
| 70,50 | -60,12 | 06.07.2016 | ge_2016_163 | Green |
| 70,50 | -61,01 | 06.07.2016 | ge_2016_166 | Green |
| 70,50 | -62,63 | 06.07.2016 | ge_2016_168 | Green |
| 70,51 | -60,43 | 06.07.2016 | ge_2016_164 | Green |
| 70,50 | -62,63 | 06.07.2016 | ge_2016_167 | Green |
| 70,50 | -59,83 | 06.07.2016 | ge_2016_162 | Green |
| 69,50 | -58,72 | 07.07.2016 | ge_2016_176 | Green |
| 70,50 | -61,61 | 07.07.2016 | ge_2016_170 | Green |
| 70,50 | -58,64 | 07.07.2016 | ge_2016_174 | Green |
| 70,50 | -59,24 | 07.07.2016 | ge_2016_172 | Green |
| 70,50 | -61,31 | 07.07.2016 | ge_2016_171 | Green |

|       |        |            |             |       |
|-------|--------|------------|-------------|-------|
| 69,50 | -58,72 | 07.07.2016 | ge_2016_175 | Green |
| 70,50 | -58,94 | 07.07.2016 | ge_2016_173 | Green |
| 69,50 | -58,72 | 07.07.2016 | ge_2016_177 | Green |
| 69,50 | -58,44 | 08.07.2016 | ge_2016_180 | Green |
| 69,50 | -57,87 | 08.07.2016 | ge_2016_178 | Green |
| 69,51 | -59,81 | 08.07.2016 | ge_2016_184 | Green |
| 69,50 | -59,00 | 08.07.2016 | ge_2016_181 | Green |
| 69,50 | -59,29 | 08.07.2016 | ge_2016_182 | Green |
| 69,51 | -59,81 | 08.07.2016 | ge_2016_185 | Green |
| 69,51 | -59,81 | 08.07.2016 | ge_2016_183 | Green |
| 69,50 | -58,16 | 08.07.2016 | ge_2016_179 | Green |
| 69,50 | -60,15 | 09.07.2016 | ge_2016_186 | Green |
| 69,34 | -60,22 | 09.07.2016 | ge_2016_191 | Green |
| 69,50 | -60,71 | 09.07.2016 | ge_2016_188 | Green |
| 69,50 | -61,58 | 09.07.2016 | ge_2016_193 | Green |
| 69,50 | -61,58 | 09.07.2016 | ge_2016_192 | Green |
| 69,50 | -60,43 | 09.07.2016 | ge_2016_187 | Green |
| 69,32 | -60,98 | 09.07.2016 | ge_2016_190 | Green |
| 69,50 | -62,71 | 10.07.2016 | ge_2016_199 | Green |
| 69,50 | -61,29 | 10.07.2016 | ge_2016_195 | Green |
| 69,50 | -62,14 | 10.07.2016 | ge_2016_197 | Green |
| 69,50 | -63,28 | 10.07.2016 | ge_2016_202 | Green |
| 69,50 | -63,23 | 10.07.2016 | ge_2016_201 | Green |

|       |       |            |             |      |
|-------|-------|------------|-------------|------|
| 77,65 | 10,28 | 22.06.2016 | ps99_038_2  | Fram |
| 77,65 | 10,28 | 22.06.2016 | ps99_039_1  | Fram |
| 78,61 | 5,06  | 25.06.2016 | ps99_041_1  | Fram |
| 78,61 | 5,05  | 25.06.2016 | ps99_041_6  | Fram |
| 79,07 | 4,18  | 26.06.2016 | ps99_042_1  | Fram |
| 78,61 | 5,03  | 27.06.2016 | ps99_043_3  | Fram |
| 79,06 | 3,47  | 28.06.2016 | ps99_046_1  | Fram |
| 79,06 | 3,58  | 28.06.2016 | ps99_045_1  | Fram |
| 79,06 | 3,28  | 29.06.2016 | ps99_047_1  | Fram |
| 78,83 | -2,78 | 29.06.2016 | ps99_048_1  | Fram |
| 78,82 | -2,73 | 30.06.2016 | ps99_048_11 | Fram |
| 78,94 | -4,65 | 01.07.2016 | ps99_050_1  | Fram |
| 78,86 | -3,97 | 01.07.2016 | ps99_049_1  | Fram |
| 78,99 | -5,42 | 02.07.2016 | ps99_051_2  | Fram |
| 79,59 | 5,17  | 04.07.2016 | ps99_054_1  | Fram |
| 79,13 | 2,84  | 06.07.2016 | ps99_059_2  | Fram |
| 79,13 | 4,90  | 06.07.2016 | ps99_057_1  | Fram |
| 79,12 | 2,82  | 07.07.2016 | ps99_059_6  | Fram |
| 79,03 | 6,97  | 08.07.2016 | ps99_062_4  | Fram |
| 78,98 | 9,51  | 09.07.2016 | ps99_064_2  | Fram |
| 79,00 | 8,36  | 09.07.2016 | ps99_063_2  | Fram |
| 79,14 | 6,09  | 09.07.2016 | ps99_066_2  | Fram |
| 79,11 | 4,60  | 10.07.2016 | ps99_069_2  | Fram |

|       |      |            |            |      |
|-------|------|------------|------------|------|
| 79,14 | 6,08 | 10.07.2016 | ps99_066_5 | Fram |
| 79,14 | 6,09 | 12.07.2016 | ps99_074_1 | Fram |
| 79,04 | 4,53 | 12.07.2016 | ps99_075_2 | Fram |
